# Supplementary material for: Rhabdomyosarcoma Associated with Core Myopathy/Malignant Hyperthermia: Combined Effect of Germline Variants in RYR1 and ASPSCR1 May Play a Role
Source: MDPI journal article supplement (doi:10.3390/genes14071360), 2023-06-27
Supplement: s1 [file s1]

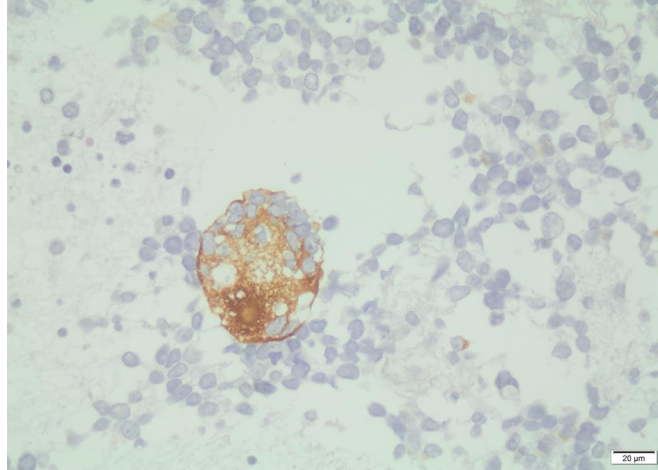

**Supplementary Figure S1.** Cytologic features of cervical nodule fine-needle aspiration cytology. Legend: Immunohistochemistry positive for desmin (focal labeling). Bar scale: 20  $\mu\text{m}$ , 400 $\times$ , Olympus BX50/Olympus SC100 microscope.
